# Supplementary material for: Inferences about spatiotemporal variation in dengue virus transmission are sensitive to assumptions about human mobility: a case study using geolocated tweets from Lahore, Pakistan
Source: PubMed Central journal article supplement (PMC6404370; doi:10.1140/epjds/s13688-018-0144-x), 2018-06-11
Supplement: 13688_2018_144_MOESM1_ESM.pdf [file 13688_2018_144_MOESM1_ESM.pdf]

## Supplementary information

### **Inferences about spatiotemporal variation in dengue virus transmission are sensitive to assumptions about human mobility: a case study using geolocated tweets from Lahore, Pakistan**

Kraemer, M.U.G.<sup>1,2,3,§</sup>, Bisanzio, D.<sup>4,5</sup>, Reiner, R.C.<sup>6</sup>, Zakar, R.<sup>7</sup>, Hawkins, J.B.<sup>1,2</sup>, Freifeld, C.C.<sup>2,8</sup>,  
Smith, D.L.<sup>5,9</sup>, Hay, S.I.<sup>6</sup>, Brownstein, J.S.<sup>1,2</sup>, Perkins, T.A.<sup>10,§</sup>

1. Department of Pediatrics, Harvard Medical School, Boston, MA, USA
2. Computational Epidemiology Lab, Boston Children's Hospital, Boston, MA, USA
3. Department of Zoology, University of Oxford, Oxford, UK
4. RTI International, Washington D.C., USA
5. Center for Tropical Diseases, Sacro Cuore-Don Calabria Hospital, Negrar, Verona, Italy
6. Institute for Health Metrics and Evaluation, University of Washington, Seattle, WA, USA
7. Department of Public Health, University of Punjab, Lahore, Pakistan
8. College of Computer and Information Science, Northeastern University, Boston, MA, USA
9. Sanaria Institute for Global Health and Tropical Medicine, Rockville, MD, USA
10. Department of Biological Sciences and Eck Institute for Global Health, University of Notre Dame, Notre Dame, IN, USA

#### **§Authors of correspondence:**

Moritz UG Kraemer, DPhil  
Computational Epidemiology Lab, Harvard University  
300 Longwood Ave  
MA, 02115 Boston  
kramer.moritz@gmail.com

T. Alex Perkins, PhD  
347 Galvin Life Science Center  
University of Notre Dame  
Notre Dame, IN 46556  
taperkins@nd.edu

Table S1: Human mobility metric as per gravity model.

|               | Iqbal.Town | Gulberg.Tow | Shalimar.Tov | Ravi.Town  | Data.Gunj.Be | Samanabad. | Nishtar.Tow | Cantonment | Aziz.Bhatti.T | Wagha.Towr |
|---------------|------------|-------------|--------------|------------|--------------|------------|-------------|------------|---------------|------------|
| Iqbal Town    | 0.95071151 | 0.00553099  | 0.00552735   | 0.00540811 | 0.00535359   | 0.00548256 | 0.00563958  | 0.00549486 | 0.00540688    | 0.00544458 |
| Gulberg Tow   | 0.01798011 | 0.84055491  | 0.01789719   | 0.01746902 | 0.01736762   | 0.01777666 | 0.01808941  | 0.01782643 | 0.01748305    | 0.01755561 |
| Shalimar Tov  | 0.00698087 | 0.00695325  | 0.93801586   | 0.00684688 | 0.00675732   | 0.00687344 | 0.00701365  | 0.00690607 | 0.00681309    | 0.00683956 |
| Ravi Town     | 0.01169284 | 0.01161859  | 0.01172127   | 0.89608667 | 0.01133526   | 0.01151933 | 0.01172971  | 0.01152367 | 0.0113571     | 0.01141554 |
| Data Gunj Be  | 0.01503785 | 0.01500693  | 0.01502876   | 0.01472645 | 0.86610123   | 0.01490343 | 0.01509262  | 0.01483634 | 0.0145989     | 0.0146675  |
| Samanabad     | 0.00771717 | 0.00769725  | 0.00766048   | 0.00749942 | 0.00746827   | 0.9316431  | 0.0077417   | 0.00759779 | 0.00746824    | 0.00750658 |
| Nishtar Towr  | 0.01117074 | 0.01102224  | 0.01099984   | 0.01074603 | 0.01064287   | 0.01089423 | 0.90188411  | 0.01098066 | 0.0107906     | 0.01086868 |
| Cantonment    | 0.0054531  | 0.00544205  | 0.00542657   | 0.00528937 | 0.00524171   | 0.00535673 | 0.0055015   | 0.9515885  | 0.00534334    | 0.00535714 |
| Aziz Bhatti T | 0.00364477 | 0.00362536  | 0.00363642   | 0.00354092 | 0.0035035    | 0.00357657 | 0.00367226  | 0.00362951 | 0.96756191    | 0.00360877 |
| Wagha Towr    | 0.01343995 | 0.01333092  | 0.01336808   | 0.01303334 | 0.01288987   | 0.01316439 | 0.01354489  | 0.01332537 | 0.01321507    | 0.88068812 |

Table S2: Human mobility metric as per radiation model.

|               | Iqbal.Town | Gulberg.Tow | Shalimar.Tov | Ravi.Town  | Data.Gunj.Be | Samanabad. | Nishtar.Tow | Cantonment | Aziz.Bhatti.T | Wagha.Towr |
|---------------|------------|-------------|--------------|------------|--------------|------------|-------------|------------|---------------|------------|
| Iqbal Town    | 0.95071151 | 0.00464972  | 0.00200325   | 0.00117877 | 0.00121689   | 0.01829407 | 0.01878077  | 0.00246325 | 0.00042652    | 0.00027527 |
| Gulberg Tow   | 0.00424727 | 0.84055491  | 0.01661344   | 0.00506369 | 0.01748131   | 0.07435086 | 0.00946928  | 0.02556011 | 0.00422534    | 0.00243381 |
| Shalimar Tov  | 0.00180863 | 0.01333619  | 0.93801586   | 0.02248866 | 0.00847237   | 0.00504835 | 0.00320064  | 0.0030844  | 0.00267679    | 0.00186811 |
| Ravi Town     | 0.00133662 | 0.00580199  | 0.03670333   | 0.89608667 | 0.04428317   | 0.00778463 | 0.00236535  | 0.00292794 | 0.00132972    | 0.00138058 |
| Data Gunj Be  | 0.00113956 | 0.01189648  | 0.00553933   | 0.01477773 | 0.86610123   | 0.09372208 | 0.00254065  | 0.00249626 | 0.00113368    | 0.000653   |
| Samanabad     | 0.00149959 | 0.02425299  | 0.00609667   | 0.00510505 | 0.02413782   | 0.9316431  | 0.00279628  | 0.00274742 | 0.00124774    | 0.00047334 |
| Nishtar Towr  | 0.01410225 | 0.02256662  | 0.00362631   | 0.00141646 | 0.00168172   | 0.00984524 | 0.90188411  | 0.03886225 | 0.00300866    | 0.00300639 |
| Cantonment    | 0.00108793 | 0.01367122  | 0.00594785   | 0.00043325 | 0.00118476   | 0.00187855 | 0.00226485  | 0.9515885  | 0.02057106    | 0.00137202 |
| Aziz Bhatti T | 0.00044094 | 0.00138345  | 0.00298071   | 0.00031324 | 0.00033569   | 0.00055426 | 0.00078032  | 0.0211542  | 0.96756191    | 0.00449528 |
| Wagha Towr    | 0.00219591 | 0.00688961  | 0.01484398   | 0.00155993 | 0.00167172   | 0.0027602  | 0.00388598  | 0.0299518  | 0.05555274    | 0.88068812 |

Table S3: Human mobility metric as per Twitter.

|               | Iqbal Town | Gulberg Tow | Shalimar Tov | Ravi Town  | Data Gunj Be | Samanabad  | Nishtar Towr | Cantonment | Aziz Bhatti T | Wagha Towr |
|---------------|------------|-------------|--------------|------------|--------------|------------|--------------|------------|---------------|------------|
| Iqbal Town    | 0.95071151 | 0.00923713  | 0.00160491   | 0.005849   | 0.00415493   | 0.01242912 | 0.00896965   | 0.00608082 | 0.00037448    | 0.00058847 |
| Gulberg Tow   | 0.02893194 | 0.84055491  | 0.010473     | 0.0045634  | 0.02464234   | 0.02411755 | 0.01473977   | 0.04581651 | 0.00419833    | 0.00196226 |
| Shalimar Tov  | 0.00712089 | 0.00954847  | 0.93801586   | 0.01650753 | 0.02168636   | 0.00161838 | 0.00064735   | 0.00113287 | 0.00226574    | 0.00145655 |
| Ravi Town     | 0.02785762 | 0.00630113  | 0.01746628   | 0.89608667 | 0.03526421   | 0.01249171 | 0.00055273   | 0.00243201 | 0.00121601    | 0.00033164 |
| Data Gunj Be  | 0.0237955  | 0.0249735   | 0.02041858   | 0.01821966 | 0.86610123   | 0.02352063 | 0.00192406   | 0.01390034 | 0.00290572    | 0.00424078 |
| Samanabad     | 0.01270553 | 0.04004254  | 0.00054617   | 0.0016385  | 0.00787628   | 0.9316431  | 0.00077613   | 0.00419685 | 0.00051742    | 5.75E-05   |
| Nishtar Towr  | 0.02230715 | 0.02186278  | 0.00053324   | 0.00017775 | 0.00071098   | 0.02292926 | 0.90188411   | 0.02701742 | 0.00106648    | 0.00151084 |
| Cantonment    | 0.00987561 | 0.01019079  | 0.00552614   | 0.00027316 | 0.00542108   | 0.00552614 | 0.0042234    | 0.9515885  | 0.00487477    | 0.00250042 |
| Aziz Bhatti T | 0.00435996 | 0.00331357  | 0.00261597   | 0.0001744  | 0.00697593   | 0.00069759 | 0.0001744    | 0.0104639  | 0.96756191    | 0.00366236 |
| Wagha Towr    | 0.00055494 | 0.04883463  | 0.00527192   | 0          | 0.00388457   | 0.02219756 | 0.00305216   | 0.0099889  | 0.02552719    | 0.88068812 |

Table S4: Human mobility metric assuming ideal free movement.



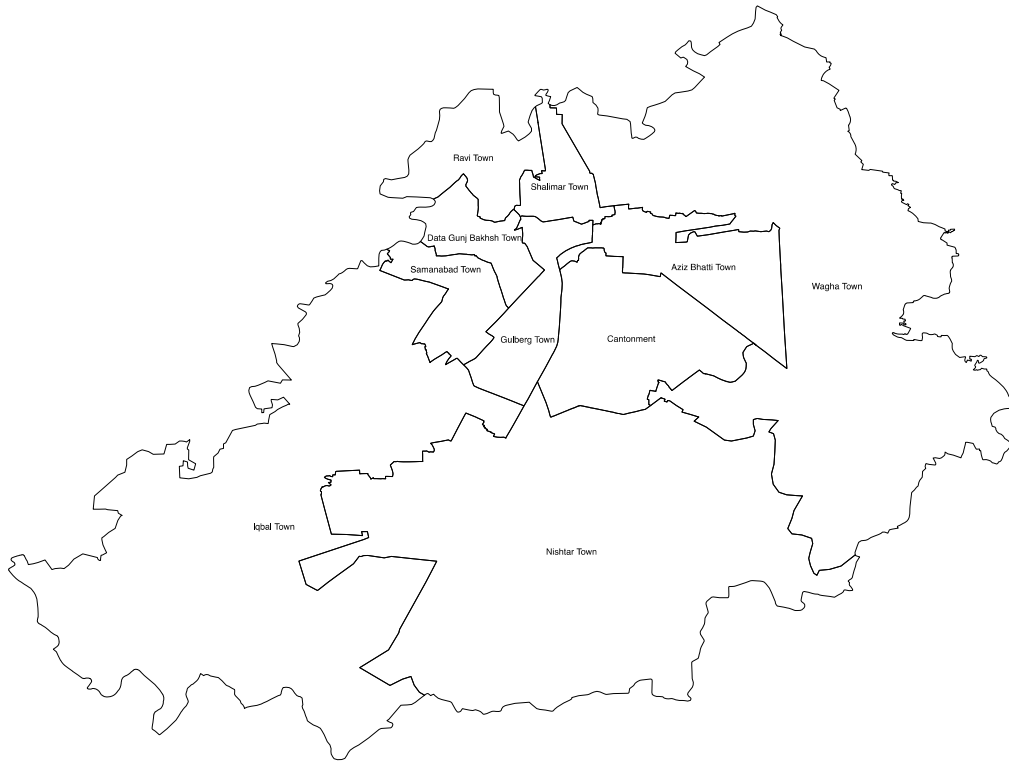

Supplementary Figure 1. Map of towns in Lahore.
